# Supplementary material for: Prognostic significance of AKR1C4 and the advantage of combining EBV DNA to stratify patients at high risk of locoregional recurrence of nasopharyngeal carcinoma
Source: PubMed Central journal article supplement (PMC9373296; doi:10.1186/s12885-022-09924-3), 2022-08-11

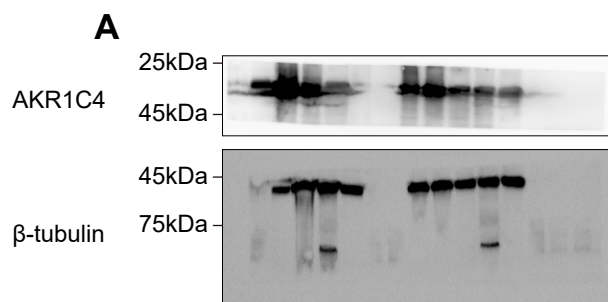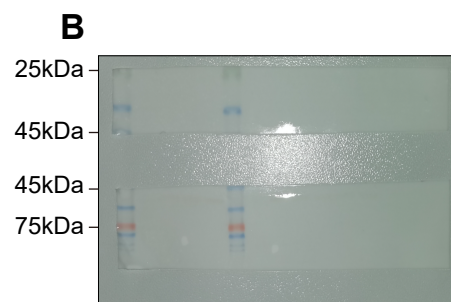

Supplement: 12885_2022_9924_MOESM1_ESM.pdf [file 12885_2022_9924_MOESM1_ESM.pdf]
